# Supplementary material
Source: publisher site journal article supplement (https://www.dovepress.com/article/532962)

**Table S. Primer name and sequences used for qRT-PCR amplification and ddPCR in this study.**

| Primer name                               | Primer Sequence                      |
|-------------------------------------------|--------------------------------------|
| <i>bla</i> <sub>IMP-45</sub> -qRT-PCR     | F AACACGGCTTGGTGGTTCTTGTA            |
|                                           | R GAGCGACGAATCTCCTATGTCACTATG        |
| <i>repA</i> -qRT-PCR                      | F ATGGATGTAATCGAATCACAGA             |
|                                           | R TCAACGCGCCCGCTTTGCCATC             |
| <i>ecfX</i> -qRT-PCR                      | F AGATCGCCCGCAACTTGT                 |
|                                           | R CGTCGAACTTGTGCAGGAC                |
| <i>bla</i> <sub>IMP-45</sub> -ddPCR       | F AAAGACGGTAAGGTACAAGCTA             |
|                                           | R TCTATTTTCAGGCAGCCAAACCA            |
| <i>repA</i> -ddPCR                        | F CTCGGCATAACCAGATCACT               |
|                                           | R CTCCCGTTAATCGTACCTT                |
| <i>bla</i> <sub>IMP-45</sub> -ddPCR probe | (FAM)CAGGGCACGCTCCAGATAACGTA(Dabcyl) |
| <i>repA</i> -ddPCR probe                  | (FAM)AACCGTGGAAGCGCATCGTA(Dabcyl)    |

**Figure S**

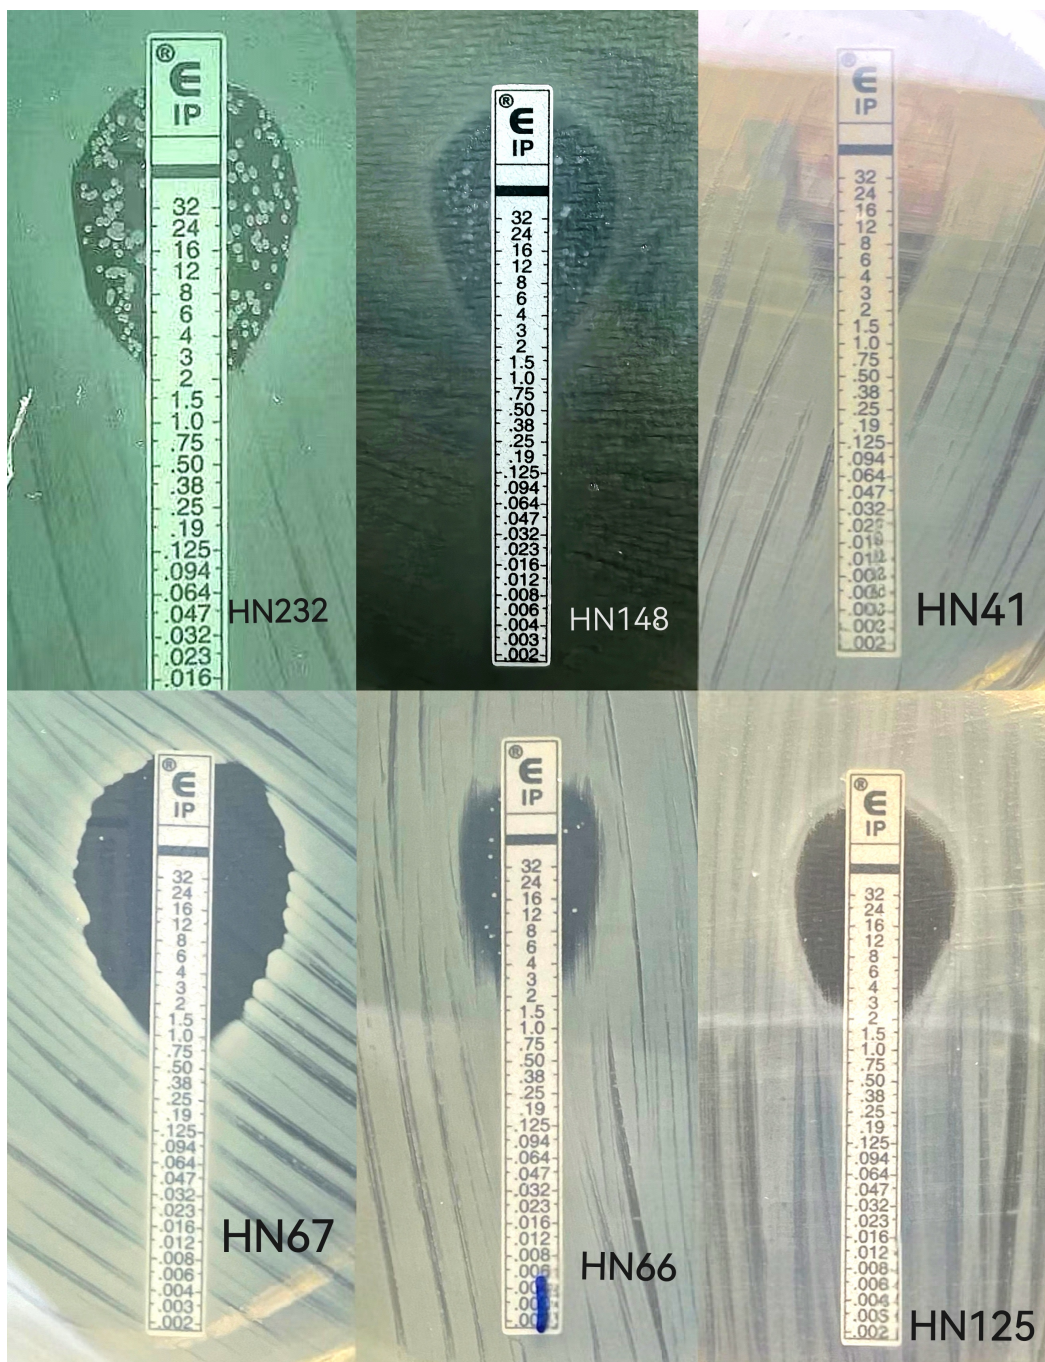

Supplement: Supplementary file 1 [file Supplementary%20Material.pdf]
